# Supplementary material
Source: Springer Nature journal article supplement (https://www.springermedizin.de/resource/supplementary/12889_2014_7047_MOESM1_ESM.pdf/9499722)
Supplement: MOESM1 [file 9499722]

## Pre-diabetes/ Type 2 diabetes screening tool for PRE-PAID

This questionnaire is intended for adults aged 18- 64 years who are members of certain ethnic minorities (**Chinese, South Asian, Hispanic, Aboriginal, African or African-Caribbean**) to help find out if you are at risk of developing type 2 diabetes. Please answer as carefully as you can. We will help you complete this form.

What ethnicity are (or were) your biological (blood) parents?

|                          |                          |                                                             |
|--------------------------|--------------------------|-------------------------------------------------------------|
| Mother                   | Father                   |                                                             |
| <input type="checkbox"/> | <input type="checkbox"/> | White (Caucasian)                                           |
| <input type="checkbox"/> | <input type="checkbox"/> | Aboriginal                                                  |
| <input type="checkbox"/> | <input type="checkbox"/> | African, African/Caribbean                                  |
| <input type="checkbox"/> | <input type="checkbox"/> | South Asian (India, Pakistan, Sri Lanka, Nepal, Bangladesh) |
| <input type="checkbox"/> | <input type="checkbox"/> | Chinese                                                     |
| <input type="checkbox"/> | <input type="checkbox"/> | Other (please specify _____)                                |

AS YOU GET OLDER, YOUR RISK FOR DIABETES INCREASES

**1) What year were you born?** \_\_\_\_\_

**Select your age group**

- 18-39 years (0 points)
- 40-44 years (0 points)
- 45-54 years (2 points)
- 55- 64 years (3 points)

BODY SHAPE AND SIZE CAN AFFECT YOUR RISK OF DIABETES

**2a) How much do you weigh (either in pounds or in kilograms)?**

**I weigh \_\_\_\_\_ pounds OR I weigh \_\_\_\_\_ kilograms**

**2b) How tall are you without shoes on?**

**I am \_\_\_\_\_ feet and \_\_\_\_\_ inches tall OR I am \_\_\_\_\_ centimeters tall**

Use the attached height and weight table to find body mass index (BMI)

- unshaded area- BMI less than 25 (0 points)
- light shaded area- BMI 25-30 (1 points)
- darker shaded area- BMI over 30 (3 points)

**3) Waist Circumference**

I am going to use a tape measure and place it around your waist at the level of the navel (belly button). I will take a measure after you breathing out (do not hold your breath).

\_\_\_\_\_ inches OR \_\_\_\_\_ cm

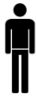

male

- Less than 94cm or 37 inches (0 pts)
- Between 94-102cm or 37-40inches (3 pts)
- Over 102cm or 40 inches (4 pts)

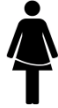

female

- Less than 80cm or 31.5 inches (0 pts)
- Between 80-88cm or 31.5-35inches (3 pts)
- Over 88cm or 35 inches (4 pts)

Research Staff NAME: \_\_\_\_\_

YOUR LEVEL OF PHYSICAL ACTIVITY AND WHAT YOU EAT CAN AFFECT YOUR RISK OF HAVING DIABETES OR "PRE-DIABETES".

**4) Daily Activity**

Over a typical seven-day period (one week), how many times do you engage in physical activity that is prolonged and intense enough to feel warm or cause sweating and an increase in you heart rate?

- At least three times per week (0 points)
- Normally once or twice per week (1 point)
- Rarely or never (3 points)

HIGH BLOOD PRESSURE AND HIGH BLOOD SUGAR ARE ASSOCIATED WITH DIABETES

**5) High Blood Pressure**

Have you ever been told by a doctor or nurse that you have high blood pressure *OR* are you taking any medication (pills) for high blood pressure?

- No or don't know (0 points)
- Yes (2 points)

**6) High Blood Sugar**

Have you ever been told by a doctor or nurse that you have high blood sugar (i.e. during a health exam) or that you have diabetes or "pre diabetes"?

- No or don't know (0 points)
- Yes (5 points)

SOME TYPES OF DIABETES RUN IN FAMILIES

**7) Family**

Have any members of your family been diagnosed with diabetes? (You can circle the one below that have)

- No or don't know (0 points)
- Yes: grandparent, aunt, uncle, or first cousin (3 points) (ignore this one if the one below applies)
- Yes: parent (mother or father), brother or sister or own child (5 points)

Note: your score cannot be greater than 5 points

Likelihood of developing diabetes in the next 10 years:

- < 7 small risk
- 7-11 moderate risk
- 12-14 high risk
- 15-20 very high risk
- 20-25 extreme risk (may already have diabetes)

**\*SCORE:**

Thank you for filling this questionnaire about diabetes risk. What is the best way for us to contact you if you are eligible and interested in participating in our research study on physical activity and diabetes prevention?

Name \_\_\_\_\_

Phone number \_\_\_\_\_

Email address \_\_\_\_\_

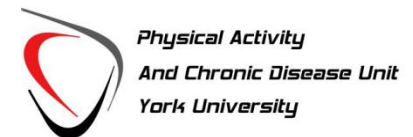

\*Source: Adapted from the FINDRISK and CANRISK Questionnaires
